# Supplementary material for: Development of Simultaneous Determination Method of Pesticide High Toxic Metabolite 3,4-Dichloroaniline and 3,5 Dichloroaniline in Chives Using HPLC-MS/MS
Source: MDPI journal article supplement (doi:10.3390/foods12152875), 2023-07-28
Supplement: s1 [file s1]

## Supplementary Materials

**Table S1.** The primary physico-chemical properties of 3, 4-DCA and 3, 5-DCA.

| Compound name | Molecule                                                                          | Molecular formula                               | Molecular weight | Melting point (°C) | Boiling point (°C) | Solubility in water (g/L) |
|---------------|-----------------------------------------------------------------------------------|-------------------------------------------------|------------------|--------------------|--------------------|---------------------------|
| 3,4-DCA       | 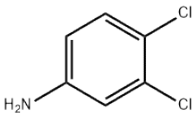 | C <sub>6</sub> H <sub>5</sub> Cl <sub>2</sub> N | 162.02           | 69-71              | 272                | 0.6                       |
| 3,5-DCA       |  | C <sub>6</sub> H <sub>5</sub> Cl <sub>2</sub> N | 162.02           | 46-52              | 260                | 0.6                       |

**Table S2.** The MS/MS parameters of two DCAs.

| Compound | Cone voltage (V) | Precursor Ion /(m/z) | Quantitative ion /(m/z) | Collision energy /eV | Qualitative ion /(m/z) | Collision energy /eV |
|----------|------------------|----------------------|-------------------------|----------------------|------------------------|----------------------|
| 3,4-DCA  | 115              | 163.03               | 128.0                   | 20                   | 75.1                   | 60                   |
| 3,5-DCA  | 115              | 163.03               | 128.0                   | 20                   | 75.1                   | 60                   |

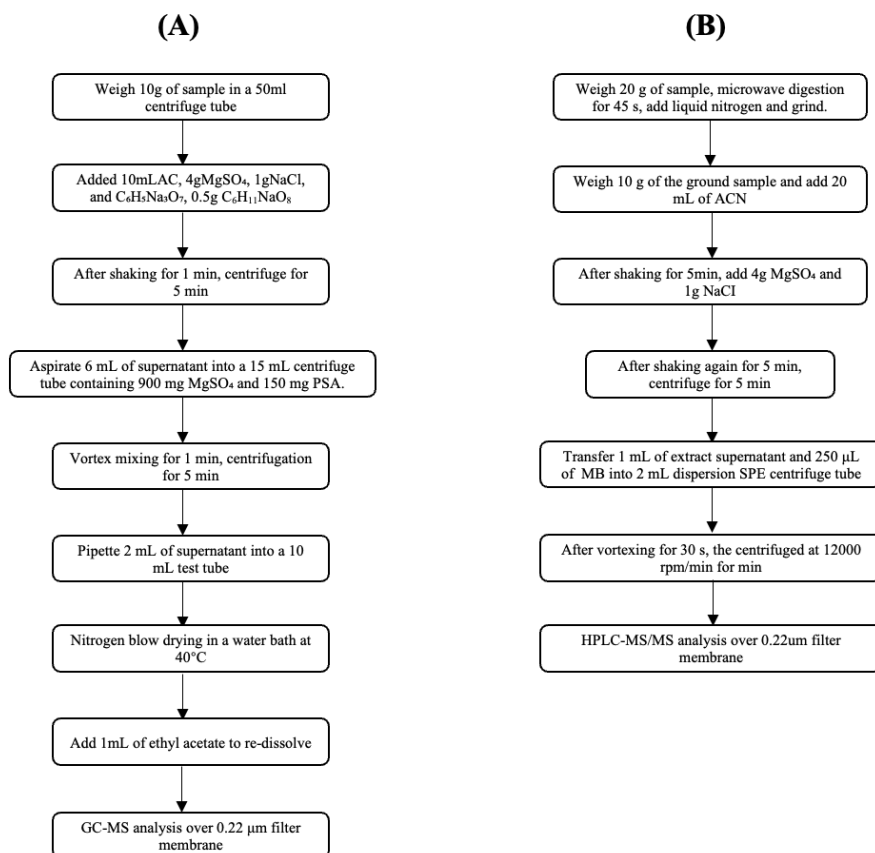

**Figure S1.** QuEChERS method in GB 23200.113 (A) and the optimized QuEChERS method in this study (B)
